# Supplementary material for: A mesoporous Ta2O5/Nb2O5 nanocomposite with Lewis/Brønsted acid sites to enhance stepwise glucose conversion to 5-hydroxymethylfurfural
Source: Royal Society of Chemistry journal article supplement (doi:10.1039/d4se00228h), 2024-01-01
Supplement: d4se00228h1.pdf [file d4se00228h1.pdf]

## Supporting Information

### **Mesoporous Ta<sub>2</sub>O<sub>5</sub>/Nb<sub>2</sub>O<sub>5</sub> nanocomposite with Lewis/Bronsted acid sites to enhance stepwise glucose conversion to 5-hydroxymethylfurfural**

Sangeeta Mahala,<sup>1,2</sup> Senthil Murugan Arumugam,<sup>1</sup> Ravi Kumar Kunchala,<sup>1</sup> Bhawana Devi<sup>1,2</sup>  
and Sasikumar Elumalai<sup>1,\*</sup>

<sup>1</sup> *Chemical Engineering Division, DBT-Center of Innovative and Applied Bioprocessing, Mohali, Punjab 140306 India*

<sup>2</sup> *Department of Chemical Sciences, Indian Institute of Science Education and Research (IISER), Mohali, Punjab 140306 India*

\*Corresponding author information: [sasikumar@ciab.res.in](mailto:sasikumar@ciab.res.in) (S. Elumalai)

Tel: +91-172-5221-444

Total pages: 31

Total Tables: 23

Total Figures: 25

## Experimental

### Mathematical expressions

$$\text{Glucose/Fructose conversion (\%)} = \frac{\text{Sugar reacted (mol)}}{\text{Initial sugar (mol)}} \times 100$$

----- (S1)

$$\text{Product yield (\%)} = \frac{\text{Product formed (mol)}}{\text{Initial sugar (mol)}} \times 100$$

----- (S2)

$$\text{Product selectivity (\%)} = \frac{\text{Product yield (\%)}}{\text{Sugar conversion (\%)}} \times 100$$

----- (S3)

### First-order kinetic rate equation

$$\ln \left\{ \frac{[\text{Sugar}]_t}{[\text{Sugar}]_0} \right\} = -k \times \text{time (sec)}$$

----- (S4)

Where, sugar can be glucose or fructose.  $[\text{Sugar}]_t$  and  $[\text{Sugar}]_0$  represent the final and initial reactant (sugar) concentration at time  $t$ .  $k$  is the observed rate constant of reaction (disappearance of sugar).

The temperature dependency of the rate constant,  $k$  was determined by using the Arrhenius equation (Eqn. S5):

$$k = A_0 \times e^{\left( \frac{-E_a}{RT} \right)}$$

----- (S5)

where,  $A_0$  is the frequency factor (or Arrhenius constant),  $E_a$  is the activation energy (J/mol), and  $R$  is the universal gas constant (8.31 J/mol. K).

The reaction's free energy change ( $\Delta G^\circ$ ) was calculated as:

$$\Delta G^\circ = -RT \ln \left( \frac{kh}{Tk_B} \right) \text{----- (S6)}$$

Where,  $\Delta G^\circ$  is the reaction activation free energy;  $k$  is the rate constant ( $s^{-1}$ );  $T$  is the temperature (K);  $k_B$  is the Boltzmann constant ( $1.381 \times 10^{-23}$  J/K),  $h$  is the Planck's constant ( $6.626 \times 10^{-34}$  J.s) and  $R$  is the universal gas constant ( $9.314$  J/mol. K).

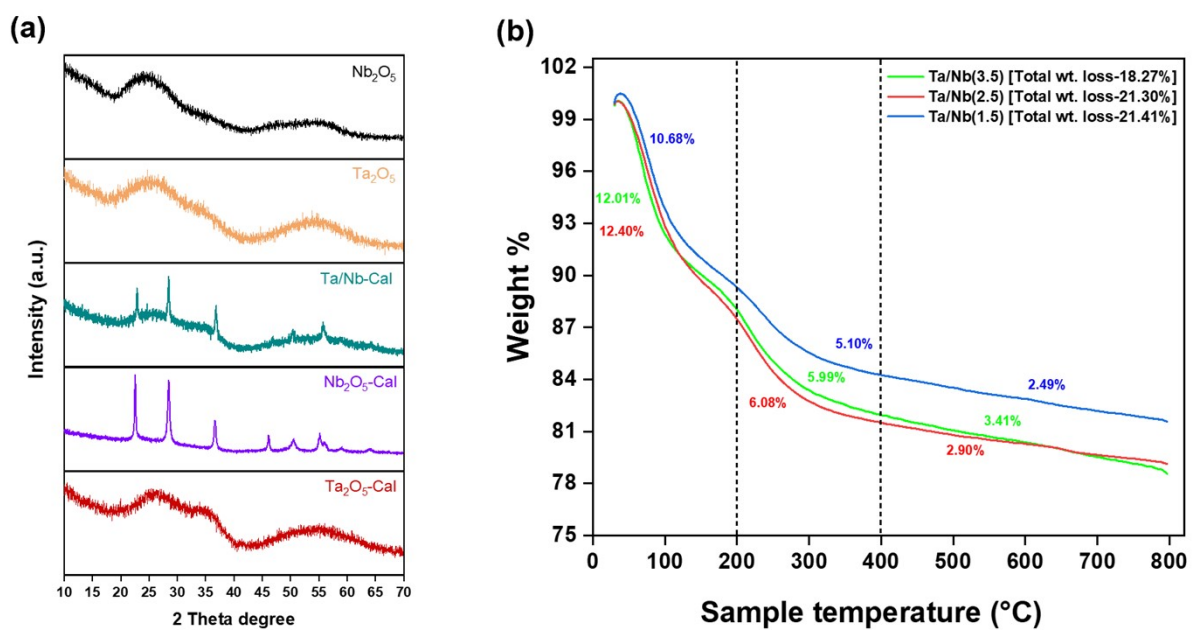

**Figure S1.** (a) XRD pattern of pure  $\text{Ta}_2\text{O}_5$ ,  $\text{Nb}_2\text{O}_5$  and calcined catalysts and (b) TGA curve of as-synthesized composite catalysts.

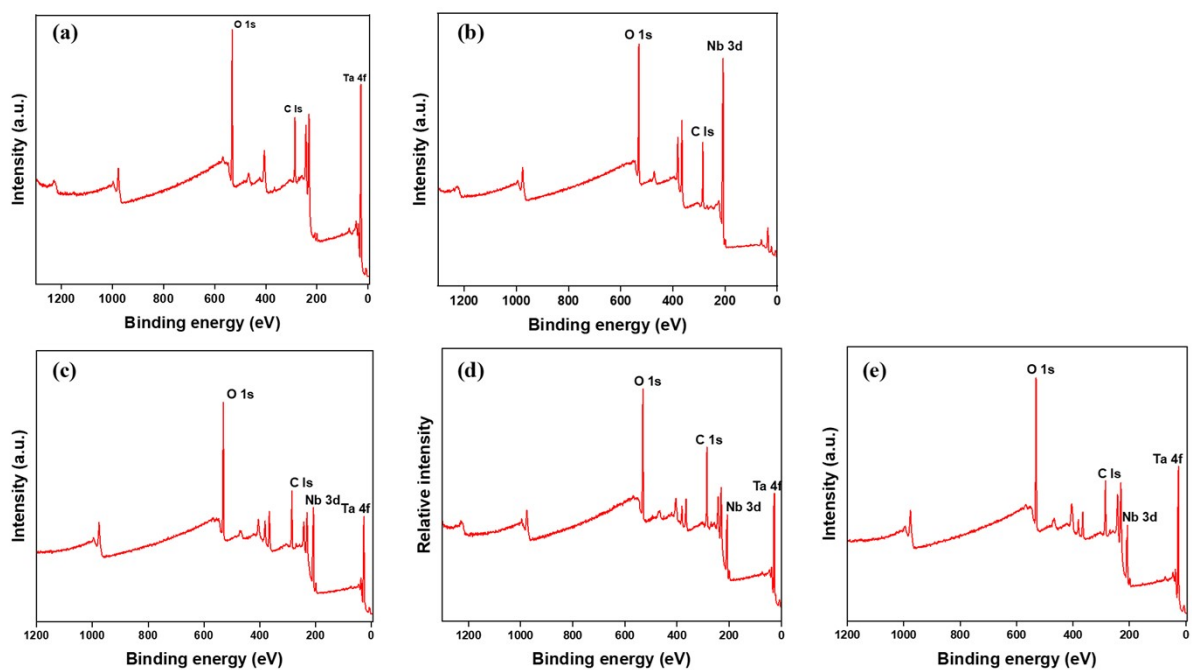

**Figure S2.** XPS survey spectrum of  $\text{Ta}_2\text{O}_5$  (a),  $\text{Nb}_2\text{O}_5$  (b), Ta/Nb-1.5 (c), Ta/Nb-2.5 (d), and Ta/Nb-3.5 (e).

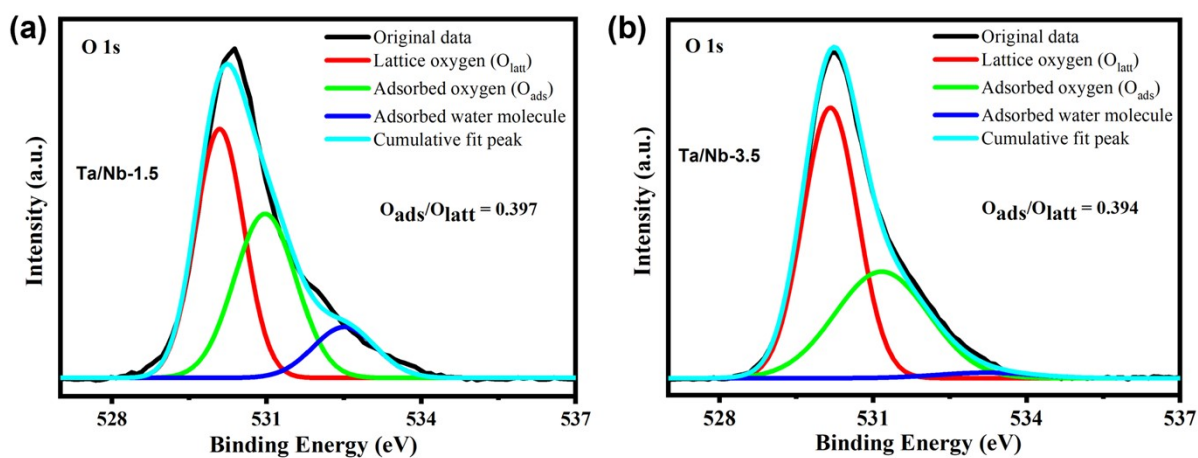

**Figure S3.** Deconvolution result of O 1s peak of (a) Ta/Nb-1.5 and (b) Ta/Nb-3.5 catalysts.

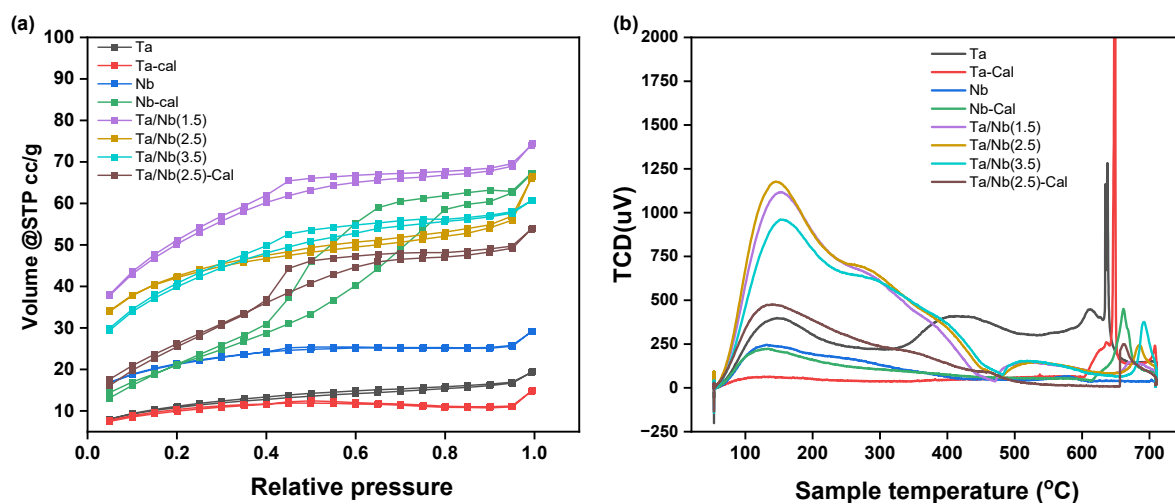

**Figure S4.** NH<sub>3</sub> TPD analysis report of as-synthesized catalysts: (a) physisorption isotherm and (b) acidic sites measurement with respect to temperature.

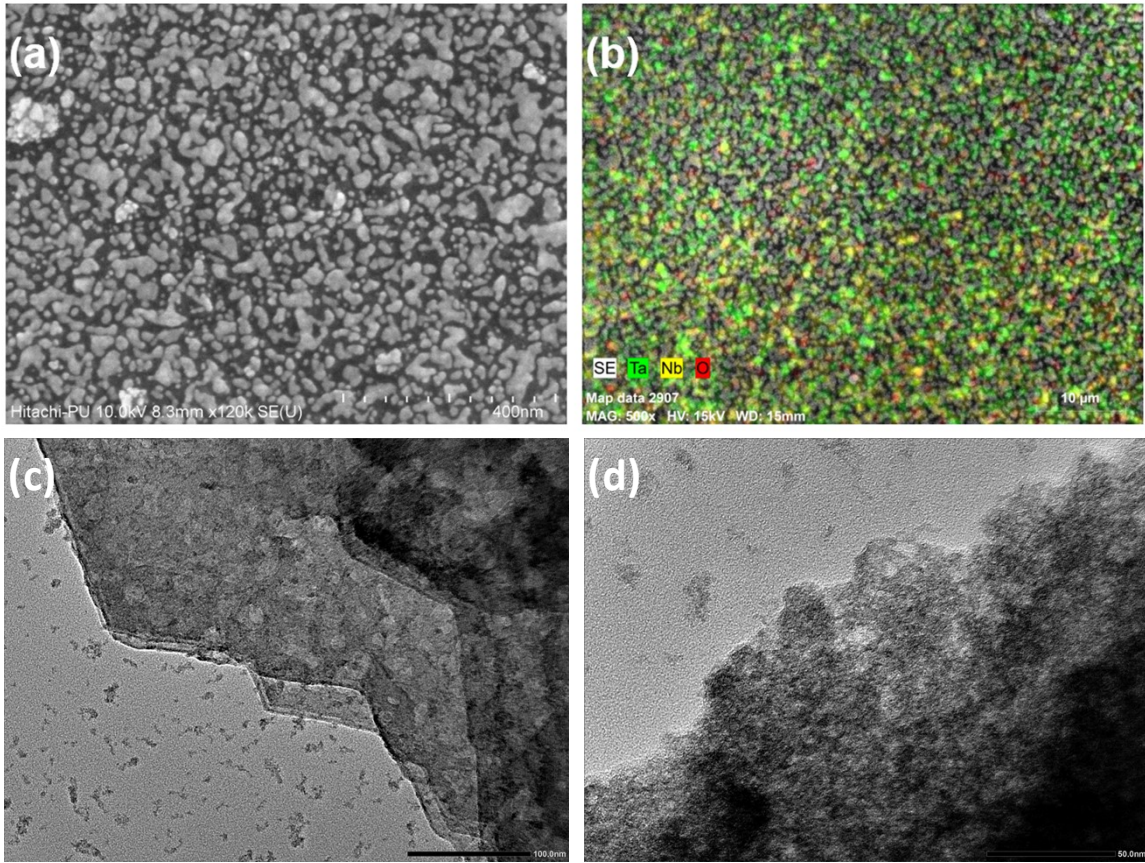

**Figure S5.** FE-SEM image (a), EDX mapping (b), and TEM images (c-d) of Ta/Nb-2.5.

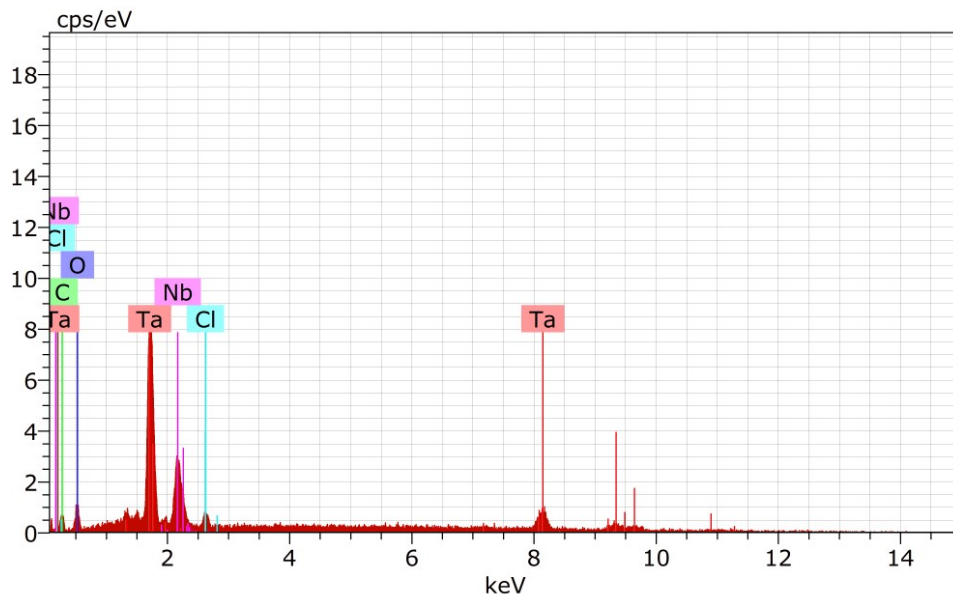

**Figure S6.** EDX report of as synthesized Ta/Nb-2.5.

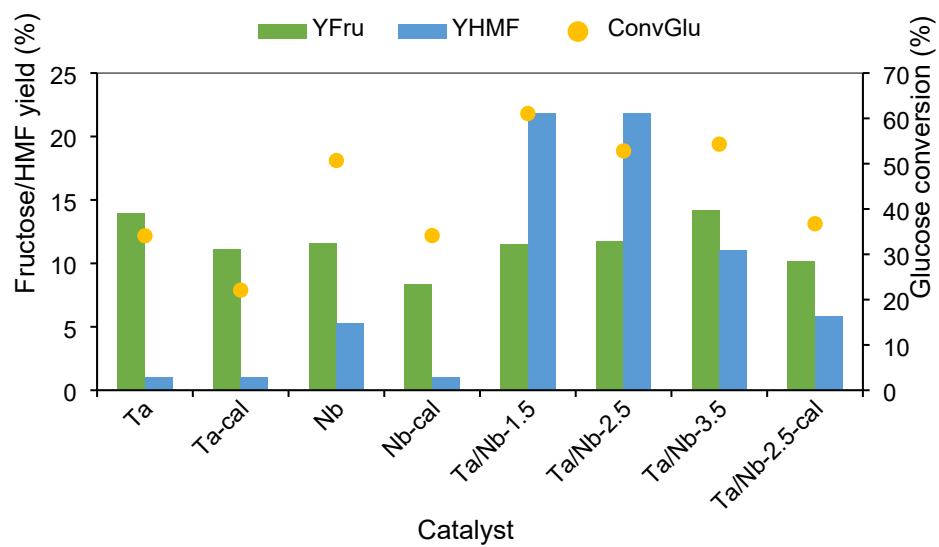

**Figure S7.** Catalyst's effectiveness on glucose decomposition to HMF in a water medium. Reaction conditions: 170 °C and 25% wt. catalyst load for 3 h. YFru-yield fructose, YHMF-yield HMF and ConvGlu-glucose conversion.

**Table S1.** Comparative result of glucose catalysis in water at 170 °C and 25% catalyst load on glucose after 180 min.

| Catalysts | $Selectivity_{Fru}$ | $Selectivity_{HMF}$ | $Yield_{LA}$<br>(%) | $Yield_{FA}$<br>(%) | $TON_{HMF}$<br>( $sec^{-1}$ ) | $TOF_{HMF}$<br>( $10^{-6}$ ) |
|-----------|---------------------|---------------------|---------------------|---------------------|-------------------------------|------------------------------|
| Ta        | 40.91               | 3.07                | 0.84                | n.d.                | 0.0125                        | 1.160                        |
| Ta-cal    | 50.19               | 0.13                | n.d.                | n.d.                | 0.0142                        | 1.315                        |
| Nb        | 22.87               | 10.46               | 7.35                | n.d.                | 0.0199                        | 1.845                        |
| Nb-cal    | 24.43               | 0.30                | 1.66                | n.d.                | 0.0143                        | 1.326                        |
| Ta/Nb-1.5 | 18.90               | 35.75               | 11.06               | n.d.                | 0.0137                        | 1.273                        |
| Ta/Nb-2.5 | 22.18               | 41.40               | 10.78               | n.d.                | 0.0132                        | 1.228                        |
| Ta/Nb-3.5 | 26.05               | 20.35               | 10.72               | n.d.                | 0.0104                        | 0.996                        |

N.d.-not detected. TON-turn over number is calculated as moles of reactant consumed per mole of catalyst. TOF-turn over frequency is calculated as moles of reactant consumed per mole of catalyst per unit time.

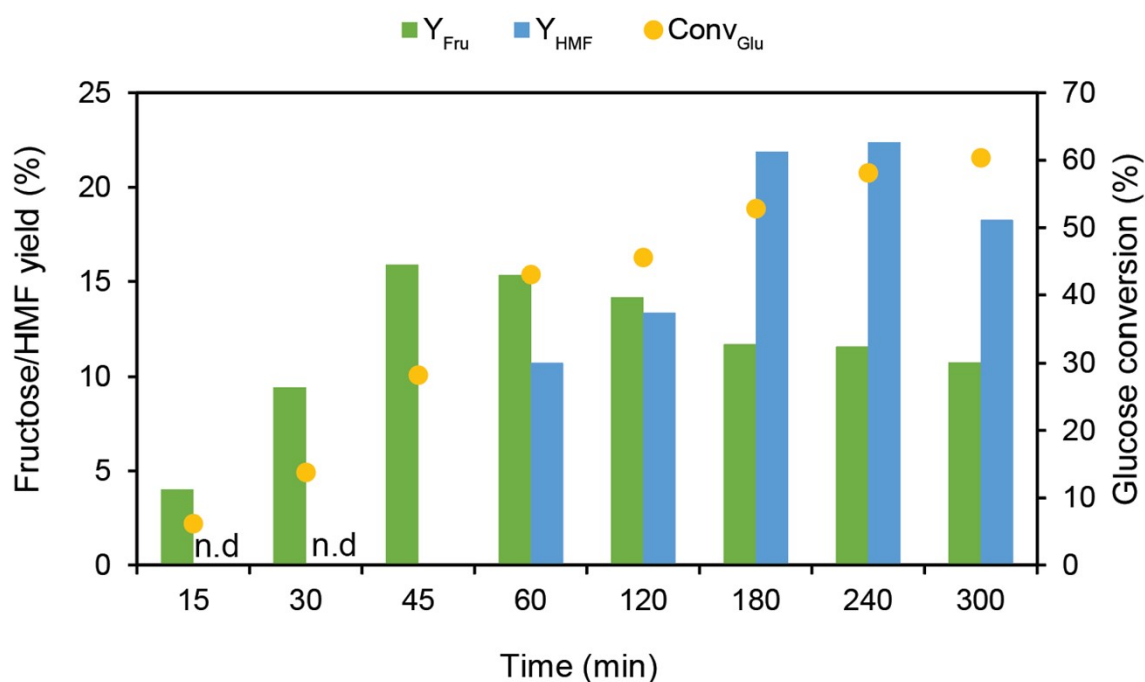

**Figure S8.** Time optimization of glucose decomposition to HMF in a water medium using Ta/Nb-2.5. Reaction conditions: 170 °C and 25% wt. catalyst load for 5 h. Y-yield and Conv-conversion. N.D.-not detected.



**Table S2.** Effect of time on dehydration of glucose to 5-HMF at 170 °C in a water medium using 25% of Ta/Nb-2.5 up to 300 min.

| Time (min) | <i>Selectivity<sub>fru</sub></i> | <i>Selectivity<sub>HMF</sub></i> | <i>Yield<sub>LA</sub></i> (%) | <i>Yield<sub>FA</sub></i> (%) | <i>TON<sub>HMF</sub></i> (sec <sup>-1</sup> ) | <i>TOF<sub>HMF</sub></i> (10 <sup>-6</sup> ) |
|------------|----------------------------------|----------------------------------|-------------------------------|-------------------------------|-----------------------------------------------|----------------------------------------------|
| 15         | 65.00                            | n.d.                             | n.d.                          | n.d.                          | 0                                             | 0                                            |
| 30         | 68.57                            | n.d.                             | n.d.                          | n.d.                          | 0                                             | 0                                            |
| 45         | 56.25                            | 0.17                             | n.d.                          | n.d.                          | 0.0048                                        | 1.773                                        |
| 60         | 35.67                            | 24.93                            | n.d.                          | n.d.                          | 0.0095                                        | 2.650                                        |
| 120        | 31.06                            | 29.25                            | 6.09                          | n.d.                          | 0.0104                                        | 1.446                                        |
| 180        | 22.18                            | 41.40                            | 9.45                          | n.d.                          | 0.0133                                        | 1.228                                        |
| 240        | 19.96                            | 38.53                            | 9.80                          | n.d.                          | 0.0134                                        | 0.9330                                       |
| 300        | 17.80                            | 30.27                            | 10.12                         | n.d.                          | 0.0121                                        | 0.6701                                       |

N.d.-not detected. TON-turn over number is calculated as moles of reactant consumed per mole of catalyst. TOF-turn over frequency is calculated as moles of reactant consumed per mole of catalyst per unit time.

**Table S3.** Comparative result of catalysts in W/DMSO (1:4 ratio) at 170 °C 25% catalyst load on glucose after 180 min.

| Catalysts | <i>Selectivity<sub>fru</sub></i> | <i>Selectivity<sub>HMF</sub></i> | <i>Yield<sub>LA</sub></i> (%) | <i>Yield<sub>FA</sub></i> (%) | <i>TON<sub>HMF</sub></i> (sec <sup>-1</sup> ) | <i>TOF<sub>HMF</sub></i> (10 <sup>-6</sup> ) |
|-----------|----------------------------------|----------------------------------|-------------------------------|-------------------------------|-----------------------------------------------|----------------------------------------------|
| Ta        | 10.67                            | 80.49                            | n.d.                          | n.d.                          | 0.0496                                        | 4.594                                        |
| Ta-cal    | 12.59                            | 71.55                            | n.d.                          | n.d.                          | 0.0764                                        | 7.075                                        |
| Nb        | 10.39                            | 79.88                            | 2.41                          | 0.69                          | 0.0667                                        | 6.177                                        |
| Nb-cal    | 12.13                            | 64.20                            | 1.47                          | n.d.                          | 0.0530                                        | 4.910                                        |
| Ta/Nb-1.5 | 6.61                             | 83.80                            | 10.11                         | 13.17                         | 0.0339                                        | 3.143                                        |
| Ta/Nb-2.5 | 6.64                             | 86.55                            | 9.83                          | 6.39                          | 0.0334                                        | 3.094                                        |
| Ta/Nb-3.5 | 9.02                             | 75.61                            | 9.77                          | 5.20                          | 0.0336                                        | 3.115                                        |

N.d.-not detected. TON-turn over number is calculated as moles of reactant consumed per mole of catalyst. TOF-turn over frequency is calculated as moles of reactant consumed per mole of catalyst per unit time.

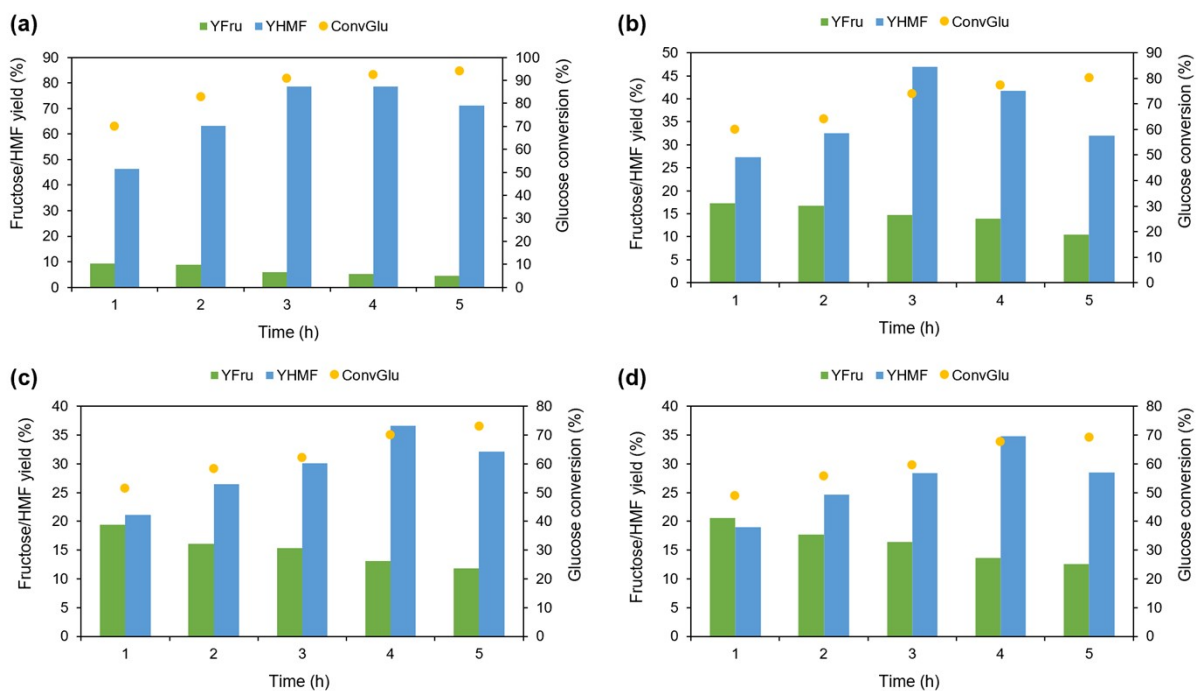

**Figure S9.** Glucose decomposition to HMF over Ta/Nb-2.5 catalyst in different aqueous-organic solvent mediums: (a) 1:4 vol. ratio W/DMSO, (b) 2:3 vol. ratio W/DMSO, (c) 3:2 vol. ratio W/DMSO, and (d) 4:1 vol. ratio W/DMSO. Reaction conditions: 170 °C and 25% wt. catalyst load for 5 h. YFru-yield fructose, YHMF-yield HMF and ConvGlu-glucose conversion.

**Table S4.** Dehydration result of glucose to 5-HMF over Ta/Nb-2.5 (25% on substrate) in W/DMSO (1:4) at 170 °C up to 300 min.

| <b>Time (min)</b> | <i>Selectivity<sub>fru</sub></i> | <i>Selectivity<sub>HMF</sub></i> | <i>Yield<sub>LA</sub></i> (%) | <i>Yield<sub>FA</sub></i> (%) | <i>TON<sub>HMF</sub></i> (sec <sup>-1</sup> ) | <i>TOF<sub>HMF</sub></i> (10 <sup>-6</sup> ) |
|-------------------|----------------------------------|----------------------------------|-------------------------------|-------------------------------|-----------------------------------------------|----------------------------------------------|
| <b>60</b>         | 13.39                            | 66.31                            | 0.91                          | n.d.                          | 0.0226                                        | 6.285                                        |
| <b>120</b>        | 10.78                            | 76.31                            | 2.76                          | 2.29                          | 0.0282                                        | 3.926                                        |
| <b>180</b>        | 6.64                             | 86.55                            | 9.83                          | 6.39                          | 0.0334                                        | 3.094                                        |
| <b>240</b>        | 5.63                             | 85.07                            | 10.38                         | 10.70                         | 0.0333                                        | 2.319                                        |
| <b>300</b>        | 4.86                             | 75.59                            | 10.88                         | 14.04                         | 0.0309                                        | 1.718                                        |

TON-turn over number is calculated as moles of reactant consumed per mole of catalyst. TOF-turn over frequency is calculated as moles of reactant consumed per mole of catalyst per unit time.

**Table S5.** Dehydration result of glucose to 5-HMF over Ta/Nb-2.5 (25% on substrate) in W/DMSO (2:3) at 170 °C up to 300 min.

| <b>Time (min)</b> | <i>Selectivity<sub>fru</sub></i> | <i>Selectivity<sub>HMF</sub></i> | <i>Yield<sub>LA</sub></i> (%) | <i>Yield<sub>FA</sub></i> (%) | <i>TON<sub>HMF</sub></i> (sec <sup>-1</sup> ) | <i>TOF<sub>HMF</sub></i> (10 <sup>-6</sup> ) |
|-------------------|----------------------------------|----------------------------------|-------------------------------|-------------------------------|-----------------------------------------------|----------------------------------------------|
| <b>60</b>         | 28.96                            | 45.68                            | 0.54                          | n.d.                          | 0.0151                                        | 4.194                                        |
| <b>120</b>        | 26.23                            | 50.83                            | 2.51                          | 2.29                          | 0.0168                                        | 2.336                                        |
| <b>180</b>        | 19.86                            | 63.40                            | 7.25                          | 3.78                          | 0.0216                                        | 2.002                                        |
| <b>240</b>        | 17.99                            | 53.97                            | 9.90                          | 6.40                          | 0.0199                                        | 1.382                                        |
| <b>300</b>        | 13.07                            | 39.93                            | 10.37                         | 9.52                          | 0.0166                                        | 0.925                                        |

TON-turn over number is calculated as moles of reactant consumed per mole of catalyst. TOF-turn over frequency is calculated as moles of reactant consumed per mole of catalyst per unit time.

**Table S6.** Dehydration result of glucose to 5-HMF over Ta/Nb-2.5 (25% on substrate) in W/DMSO (3:2) at 170 °C up to 300 min.

| <b>Time (min)</b> | <i>Selectivity<sub>fru</sub></i> | <i>Selectivity<sub>HMF</sub></i> | <i>Yield<sub>LA</sub></i> (%) | <i>Yield<sub>FA</sub></i> (%) | <i>TON<sub>HMF</sub></i> (sec <sup>-1</sup> ) | <i>TOF<sub>HMF</sub></i> (10 <sup>-6</sup> ) |
|-------------------|----------------------------------|----------------------------------|-------------------------------|-------------------------------|-----------------------------------------------|----------------------------------------------|
| <b>60</b>         | 37.72                            | 41.04                            | n.d.                          | n.d.                          | 0.0130                                        | 3.615                                        |
| <b>120</b>        | 27.57                            | 45.39                            | 1.51                          | n.d.                          | 0.0148                                        | 2.053                                        |
| <b>180</b>        | 24.64                            | 48.52                            | 6.49                          | 1.68                          | 0.0160                                        | 1.484                                        |
| <b>240</b>        | 18.72                            | 52.15                            | 9.39                          | 4.24                          | 0.0182                                        | 1.262                                        |
| <b>300</b>        | 16.24                            | 43.99                            | 9.75                          | 7.35                          | 0.0167                                        | 0.9265                                       |

N.d.-not detected. TON-turn over number is calculated as moles of reactant consumed per mole of catalyst. TOF-turn over frequency is calculated as moles of reactant consumed per mole of catalyst per unit time.

**Table S7.** Dehydration result of glucose to 5-HMF over Ta/Nb-2.5 (25% on substrate) in W/DMSO (4:1) at 170 °C up to 300 min.

| <b>Time (min)</b> | <i>Selectivity<sub>fru</sub></i> | <i>Selectivity<sub>HMF</sub></i> | <i>Yield<sub>LA</sub></i> (%) | <i>Yield<sub>FA</sub></i> (%) | <i>TON<sub>HMF</sub></i> (sec <sup>-1</sup> ) | <i>TOF<sub>HMF</sub></i> (10 <sup>-6</sup> ) |
|-------------------|----------------------------------|----------------------------------|-------------------------------|-------------------------------|-----------------------------------------------|----------------------------------------------|
| <b>60</b>         | 41.94                            | 38.76                            | n.d.                          | n.d.                          | 0.0123                                        | 3.416                                        |
| <b>120</b>        | 31.73                            | 44.22                            | 1.14                          | n.d.                          | 0.0142                                        | 1.970                                        |
| <b>180</b>        | 27.56                            | 47.56                            | 5.35                          | 0.76                          | 0.0154                                        | 1.429                                        |
| <b>240</b>        | 20.15                            | 51.43                            | 8.70                          | 5.11                          | 0.0176                                        | 1.221                                        |
| <b>300</b>        | 18.21                            | 41.22                            | 9.61                          | 6.69                          | 0.0155                                        | 0.860                                        |

N.d.-not detected. TON-turn over number is calculated as moles of reactant consumed per mole of catalyst. TOF-turn over frequency is calculated as moles of reactant consumed per mole of catalyst per unit time.

**Table S8.** Effect of catalyst loading on dehydration of glucose to 5-HMF at 170 °C in W/DMSO (1:4) using Ta/Nb-2.5 after 180 min.

| Catalyst:substrate (wt.%) | $Selectivity_{fru}$ | $Selectivity_{HMF}$ | $Yield_{LA}$ (%) | $Yield_{FA}$ (%) | $TON_{HMF}$ ( $sec^{-1}$ ) | $TOF_{HMF}$ ( $10^{-6}$ ) |
|---------------------------|---------------------|---------------------|------------------|------------------|----------------------------|---------------------------|
| 1:6                       | 16.14               | 84.33               | 0.91             | n.d.             | 0.0230                     | 2.127                     |
| 1:4                       | 8.29                | 86.55               | 9.83             | 6.39             | 0.0334                     | 3.094                     |
| 1:2                       | 7.58                | 56.33               | 13.39            | 8.50             | 0.0232                     | 2.147                     |

TON-turn over number is calculated as moles of reactant consumed per mole of catalyst. TOF-turn over frequency is calculated as moles of reactant consumed per mole of catalyst per unit time.

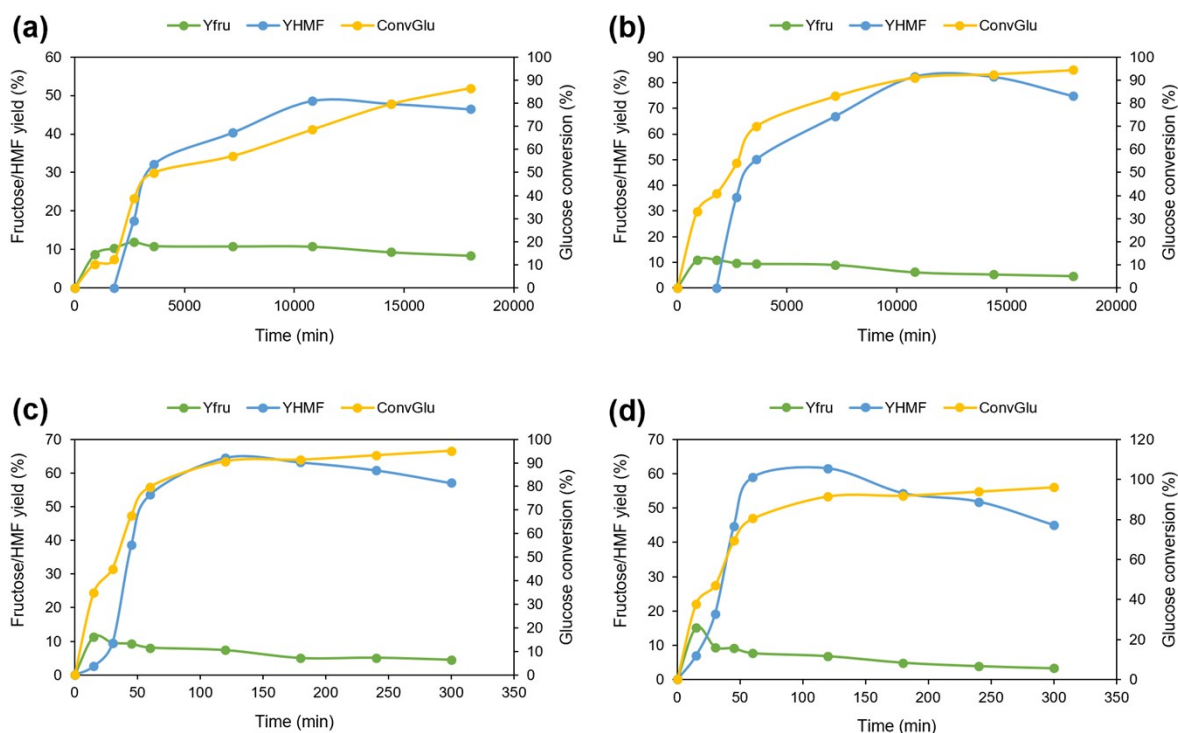

**Figure S10.** Glucose degradation and product(s) formation profile under different temperature conditions: (a) 160 °C, (b) 170 °C, (c) 180 °C, and (d) 190 °C. Reaction conditions: 1:4 vol. ratio W/DMSO medium and 25% wt. catalyst load (Ta/Nb-2.5) up to 5 h. Y-fru-yield fructose, Y-HMF-yield HMF and ConvGlu-glucose conversion.

**Table S9.** Effect of time on dehydration of glucose to 5-HMF at 160 °C in C in W/DMSO (1:4) using 25% of Ta/Nb-2.5 up to 300 min.

| <b>Time (min)</b> | <b><i>Selectivity<sub>fru</sub></i></b> | <b><i>Selectivity<sub>HMF</sub></i></b> | <b><i>Yield<sub>LA</sub></i> (%)</b> | <b><i>Yield<sub>FA</sub></i> (%)</b> | <b><i>TON<sub>HMF</sub></i> (sec<sup>-1</sup>)</b> | <b><i>TOF<sub>HMF</sub></i> (10<sup>-6</sup>)</b> |
|-------------------|-----------------------------------------|-----------------------------------------|--------------------------------------|--------------------------------------|----------------------------------------------------|---------------------------------------------------|
| 15                | 84.08                                   | n.d.                                    | n.d.                                 | n.d.                                 | 0                                                  | 0                                                 |
| 30                | 83.43                                   | n.d.                                    | n.d.                                 | n.d.                                 | 0                                                  | 0                                                 |
| 45                | 30.70                                   | 44.82                                   | n.d.                                 | n.d.                                 | 0.0118                                             | 4.353                                             |
| 60                | 21.71                                   | 64.16                                   | 0.63                                 | n.d.                                 | 0.0166                                             | 4.621                                             |
| 120               | 18.78                                   | 70.59                                   | 2.49                                 | n.d.                                 | 0.0194                                             | 2.696                                             |
| 180               | 15.59                                   | 70.90                                   | 10.37                                | n.d.                                 | 0.0222                                             | 2.052                                             |
| 240               | 11.57                                   | 60.10                                   | 9.38                                 | n.d.                                 | 0.0219                                             | 1.522                                             |
| 300               | 9.62                                    | 53.69                                   | 10.15                                | n.d.                                 | 0.0215                                             | 1.191                                             |

N.d.-not detected. TON-turn over number is calculated as moles of reactant consumed per mole of catalyst. TOF-turn over frequency is calculated as moles of reactant consumed per mole of catalyst per unit time.

**Table S10.** Effect of time on dehydration of glucose to 5-HMF at 170 °C in W/DMSO (1:4) using 25% of Ta/Nb-2.5 up to 300 min.

| <b>Time (min)</b> | <b><i>Selectivity<sub>fru</sub></i></b> | <b><i>Selectivity<sub>HMF</sub></i></b> | <b><i>Yield<sub>LA</sub></i> (%)</b> | <b><i>Yield<sub>FA</sub></i> (%)</b> | <b><i>TON<sub>HMF</sub></i> (sec<sup>-1</sup>)</b> | <b><i>TOF<sub>HMF</sub></i> (10<sup>-6</sup>)</b> |
|-------------------|-----------------------------------------|-----------------------------------------|--------------------------------------|--------------------------------------|----------------------------------------------------|---------------------------------------------------|
| 15                | 32.84                                   | n.d.                                    | n.d.                                 | n.d.                                 | 0                                                  | 0                                                 |
| 30                | 26.56                                   | n.d.                                    | n.d.                                 | n.d.                                 | 0                                                  | 0                                                 |
| 45                | 17.88                                   | 65.36                                   | n.d.                                 | n.d.                                 | 0.0177                                             | 6.557                                             |
| 60                | 13.39                                   | 71.42                                   | 0.91                                 | n.d.                                 | 0.0226                                             | 6.285                                             |
| 120               | 10.78                                   | 80.62                                   | 2.76                                 | 2.29                                 | 0.0283                                             | 3.926                                             |
| 180               | 6.64                                    | 90.48                                   | 9.83                                 | 6.39                                 | 0.0334                                             | 3.094                                             |
| 240               | 5.63                                    | 88.94                                   | 10.38                                | 10.70                                | 0.0334                                             | 2.319                                             |
| 300               | 4.86                                    | 79.39                                   | 10.88                                | 14.04                                | 0.0309                                             | 1.717                                             |

N.d.-not detected. TON-turn over number is calculated as moles of reactant consumed per mole of catalyst. TOF-turn over frequency is calculated as moles of reactant consumed per mole of catalyst per unit time.

**Table S11.** Effect of time on dehydration of glucose to 5-HMF at 180 °C in C in W/DMSO (1:4) using 25% of Ta/Nb-2.5 up to 300 min.

| <b>Time (min)</b> | <b><i>Selectivity<sub>fru</sub></i></b> | <b><i>Selectivity<sub>HMF</sub></i></b> | <b><i>Yield<sub>LA</sub></i> (%)</b> | <b><i>Yield<sub>FA</sub></i> (%)</b> | <b><i>TON<sub>HMF</sub></i> (sec<sup>-1</sup>)</b> | <b><i>TOF<sub>HMF</sub></i> (10<sup>-6</sup>)</b> |
|-------------------|-----------------------------------------|-----------------------------------------|--------------------------------------|--------------------------------------|----------------------------------------------------|---------------------------------------------------|
| 15                | 32.60                                   | 7.51                                    | n.d.                                 | n.d.                                 | 0.0056                                             | 6.271                                             |
| 30                | 21.34                                   | 20.85                                   | n.d.                                 | n.d.                                 | 0.0091                                             | 5.058                                             |
| 45                | 13.83                                   | 57.02                                   | 1.49                                 | n.d.                                 | 0.0188                                             | 6.978                                             |
| 60                | 10.27                                   | 67.11                                   | 4.00                                 | n.d.                                 | 0.0239                                             | 6.628                                             |
| 120               | 8.21                                    | 71.15                                   | 8.55                                 | n.d.                                 | 0.0275                                             | 3.822                                             |
| 180               | 5.59                                    | 69.16                                   | 13.06                                | 1.00                                 | 0.0271                                             | 2.506                                             |
| 240               | 5.58                                    | 65.24                                   | 14.76                                | 9.86                                 | 0.0263                                             | 1.825                                             |
| 300               | 4.81                                    | 59.94                                   | 16.16                                | 19.86                                | 0.0250                                             | 1.390                                             |

N.d.-not detected. TON-turn over number is calculated as moles of reactant consumed per mole of catalyst. TOF-turn over frequency is calculated as moles of reactant consumed per mole of catalyst per unit time.

**Table S12.** Effect of time on dehydration of glucose to 5-HMF at 190 °C in C in W/DMSO (1:4) using 25% of Ta/Nb-2.5 up to 300 min.

| <b>Time (min)</b> | <b><i>Selectivity<sub>fru</sub></i></b> | <b><i>Selectivity<sub>HMF</sub></i></b> | <b><i>Yield<sub>LA</sub></i> (%)</b> | <b><i>Yield<sub>FA</sub></i> (%)</b> | <b><i>TON<sub>HMF</sub></i> (sec<sup>-1</sup>)</b> | <b><i>TOF<sub>HMF</sub></i> (10<sup>-6</sup>)</b> |
|-------------------|-----------------------------------------|-----------------------------------------|--------------------------------------|--------------------------------------|----------------------------------------------------|---------------------------------------------------|
| 15                | 39.96                                   | 18.56                                   | n.d.                                 | n.d.                                 | 0.0083                                             | 9.236                                             |
| 30                | 20.26                                   | 40.66                                   | 2.19                                 | n.d.                                 | 0.0123                                             | 6.859                                             |
| 45                | 13.19                                   | 64.59                                   | 4.80                                 | n.d.                                 | 0.0209                                             | 7.745                                             |
| 60                | 9.56                                    | 73.31                                   | 6.30                                 | n.d.                                 | 0.0256                                             | 7.125                                             |
| 120               | 7.45                                    | 67.17                                   | 9.80                                 | n.d.                                 | 0.0265                                             | 3.682                                             |
| 180               | 5.32                                    | 59.00                                   | 15.55                                | 1.00                                 | 0.0241                                             | 2.230                                             |
| 240               | 4.14                                    | 55.12                                   | 18.04                                | 13.25                                | 0.0233                                             | 1.616                                             |
| 300               | 3.39                                    | 46.80                                   | 22.79                                | 26.47                                | 0.0210                                             | 1.166                                             |

N.d.-not detected. TON-turn over number is calculated as moles of reactant consumed per mole of catalyst. TOF-turn over frequency is calculated as moles of reactant consumed per mole of catalyst per unit time.

**Table S13.** Effect of temperature on dehydration of glucose to 5-HMF in W/DMSO (1:4) using 25% of Ta/Nb-2.5 after 180 min.

| Temperature (°C) | $Selectivity_{fru}$ | $Selectivity_{HMF}$ | $Yield_{LA}$ (%) | $Yield_{FA}$ (%) | $TON_{HMF}$ (sec <sup>-1</sup> ) | $TOF_{HMF}$ (10 <sup>-6</sup> ) | Carbon balance (%) |
|------------------|---------------------|---------------------|------------------|------------------|----------------------------------|---------------------------------|--------------------|
| 160              | 15.59               | 70.90               | 8.81             | n.d.             | 0.0222                           | 2.051                           | 98.39              |
| 170              | 6.64                | 86.55               | 8.28             | 0.56             | 0.0334                           | 3.094                           | 98.69              |
| 180              | 5.59                | 69.16               | 13.83            | 0.78             | 0.0271                           | 2.506                           | 87.57              |
| 190              | 5.32                | 59.00               | 16.32            | 1.23             | 0.0241                           | 2.230                           | 82.22              |

N.d.-not detected. TON-turn over number is calculated as moles of reactant consumed per mole of catalyst. TOF-turn over frequency is calculated as moles of reactant consumed per mole of catalyst per unit time.

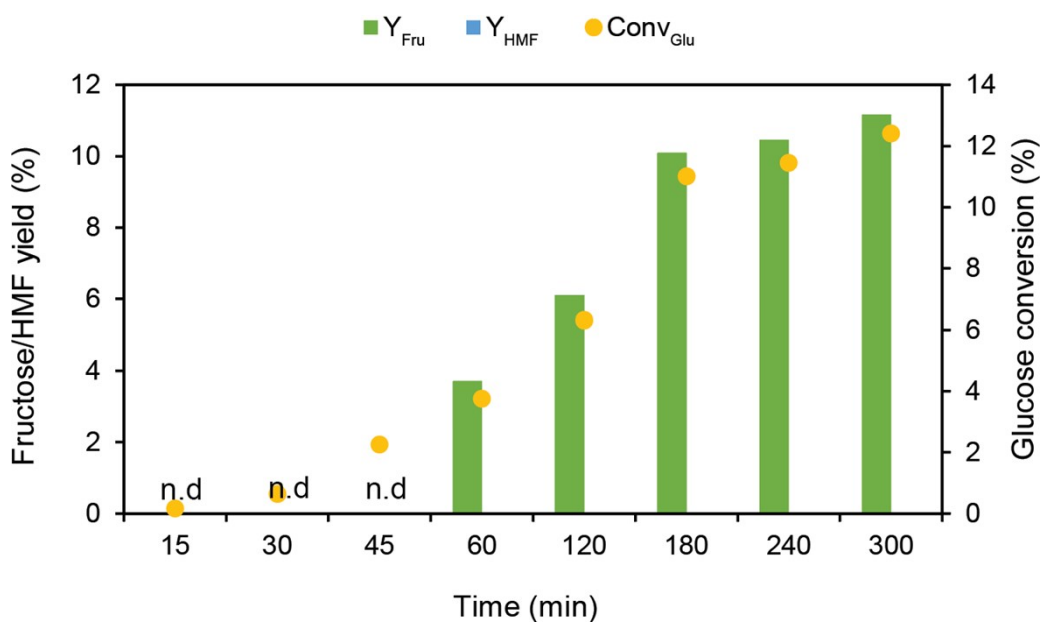

**Figure S11.** Glucose isomerization over Ta/Nb-2.5 catalyst in a water medium at 120 °C and 25% wt. catalyst load for 5 h. N.D.-not detected.  $Y_{Fru}$ -yield fructose,  $Y_{HMF}$ -yield HMF and  $Conv_{Glu}$ -glucose conversion.



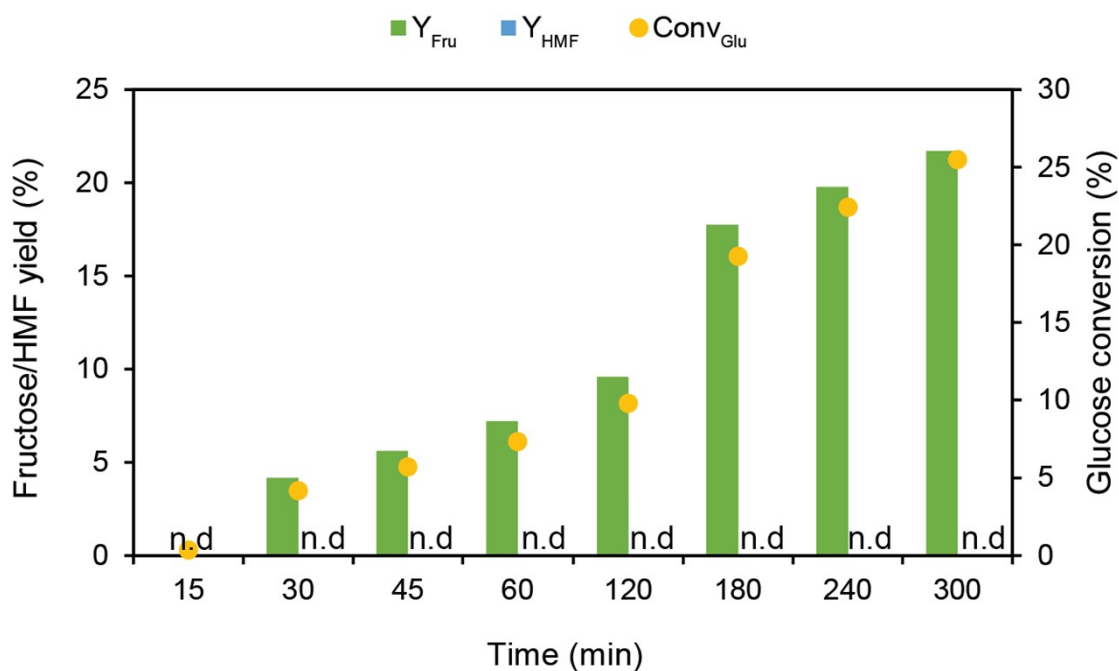

**Figure S12.** Glucose isomerization over Ta/Nb-2.5 catalyst in 1:4 vol. ratio W/DMSO at 120 °C and 25% wt. catalyst load for 5 h. N.D.-not detected. Y<sub>Fru</sub>-yield fructose, Y<sub>HMF</sub>-yield HMF and Conv<sub>Glu</sub>-glucose conversion.

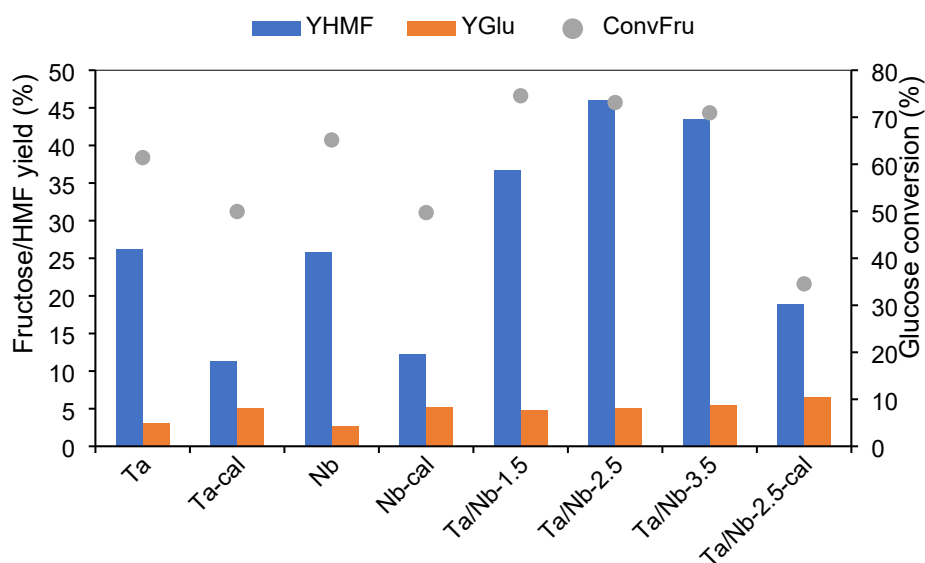

**Figure S13.** Catalyst's effectiveness on fructose decomposition to HMF in a water medium. Reaction conditions: 170 °C and 25% wt. catalyst load for 3 h. Y<sub>HMF</sub>-yield HMF, Y<sub>Glu</sub>-yield glucose and Conv<sub>Fru</sub>-fructose conversion.

**Table S14.** Comparative result of catalysis in water at 170 °C using 25% catalyst load on substrate (fructose) after 180 min.

| Catalysts | $Selectivity_{HMF}$ | $Yield_{LA}$ (%) | $Yield_{FA}$ (%) | $TON_{HMF}$ ( $sec^{-1}$ ) | $TOF_{HMF}$ ( $10^{-6}$ ) |
|-----------|---------------------|------------------|------------------|----------------------------|---------------------------|
| Ta        | 42.69               | n.d.             | n.d.             | 0.0268                     | 2.485                     |
| Ta-cal    | 22.54               | n.d.             | n.d.             | 0.0337                     | 3.126                     |
| Nb        | 39.56               | n.d.             | n.d.             | 0.0345                     | 3.192                     |
| Nb-cal    | 24.63               | n.d.             | n.d.             | 0.0264                     | 2.446                     |
| Ta/Nb-1.5 | 49.31               | n.d.             | n.d.             | 0.0177                     | 1.637                     |
| Ta/Nb-2.5 | 62.91               | n.d.             | n.d.             | 0.0201                     | 1.864                     |
| Ta/Nb-3.5 | 61.24               | n.d.             | n.d.             | 0.0208                     | 1.927                     |

N.d.-not detected. TON-turn over number is calculated as moles of reactant consumed per mole of catalyst. TOF-turn over frequency is calculated as moles of reactant consumed per mole of catalyst per unit time.

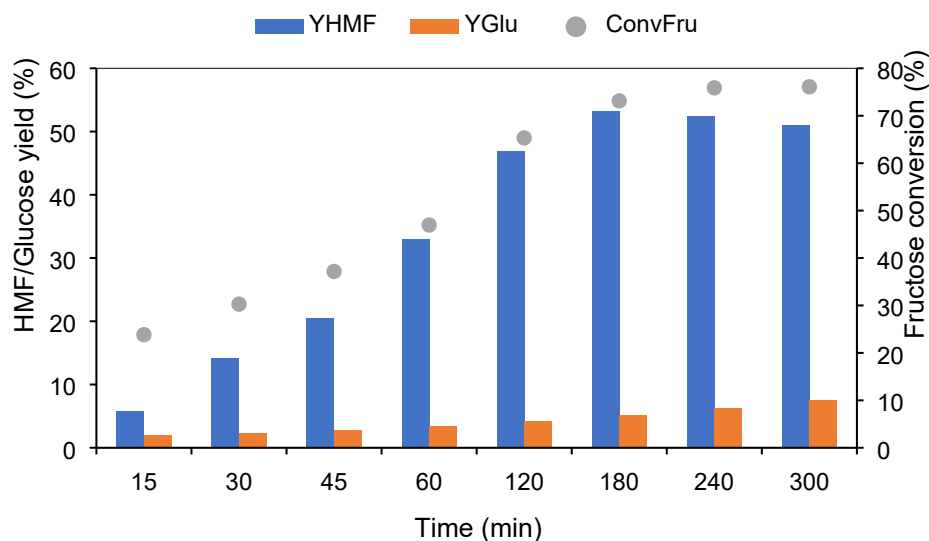

**Figure S14.** Time optimization of fructose decomposition to HMF in a water medium. Reaction conditions: 170 °C and 25% wt. catalyst load for 5 h. YHMF-yield HMF, YGlu-yield glucose and ConvFru-fructose conversion.

**Table S15.** Effect of time on dehydration of fructose to 5-HMF at 170 °C in a water medium using 25% of Ta/Nb-2.5 load on substrate up to 300 min.

| Time (min) | <i>Selectivity</i> <sub>HMF</sub> | <i>Yield</i> <sub>LA</sub> (%) | <i>Yield</i> <sub>FA</sub> (%) | <i>TON</i> <sub>HMF</sub> (sec <sup>-1</sup> ) | <i>TOF</i> <sub>HMF</sub> (10 <sup>-6</sup> ) |
|------------|-----------------------------------|--------------------------------|--------------------------------|------------------------------------------------|-----------------------------------------------|
| 15         | 23.92                             | n.d.                           | n.d.                           | 0.0043                                         | 4.766                                         |
| 30         | 46.82                             | n.d.                           | n.d.                           | 0.0071                                         | 3.954                                         |
| 45         | 55.12                             | n.d.                           | n.d.                           | 0.0092                                         | 3.417                                         |
| 60         | 70.24                             | n.d.                           | n.d.                           | 0.0134                                         | 3.722                                         |
| 120        | 71.71                             | n.d.                           | n.d.                           | 0.0180                                         | 2.504                                         |
| 180        | 72.67                             | n.d.                           | n.d.                           | 0.0201                                         | 1.864                                         |
| 240        | 69.11                             | n.d.                           | n.d.                           | 0.0199                                         | 1.381                                         |
| 300        | 66.92                             | n.d.                           | n.d.                           | 0.0194                                         | 1.077                                         |

N.d.-not detected. TON-turn over number is calculated as moles of reactant consumed per mole of catalyst. TOF-turn over frequency is calculated as moles of reactant consumed per mole of catalyst per unit time.

**Table S16.** Comparative result of catalysis in W/DMSO (1:4) at 170 °C using 25% catalyst load on substrate (fructose) after 180 min.

| Catalysts | <i>Selectivity</i> <sub>HMF</sub> | <i>Yield</i> <sub>LA</sub> (%) | <i>Yield</i> <sub>FA</sub> (%) | <i>TON</i> <sub>HMF</sub> (sec <sup>-1</sup> ) | <i>TOF</i> <sub>HMF</sub> (10 <sup>-6</sup> ) |
|-----------|-----------------------------------|--------------------------------|--------------------------------|------------------------------------------------|-----------------------------------------------|
| Ta        | 77.26                             | 10.79                          | 3.81                           | 0.0843                                         | 7.810                                         |
| Ta-cal    | 80.20                             | 12.69                          | 4.95                           | 0.1626                                         | 15.068                                        |
| Nb        | 86.06                             | 8.76                           | 3.54                           | 0.1109                                         | 10.272                                        |
| Nb-cal    | 82.59                             | 11.79                          | 4.11                           | 0.1249                                         | 11.566                                        |
| Ta/Nb-1.5 | 89.65                             | 7.51                           | 0.65                           | 0.0459                                         | 4.250                                         |
| Ta/Nb-2.5 | 92.30                             | 6.12                           | 1.25                           | 0.0451                                         | 4.178                                         |
| Ta/Nb-3.5 | 91.41                             | 6.50                           | 0.95                           | 0.0484                                         | 4.481                                         |

N.d.-not detected. TON-turn over number is calculated as moles of reactant consumed per mole of catalyst. TOF-turn over frequency is calculated as moles of reactant consumed per mole of catalyst per unit time.

**Table S17.** Effect of time on dehydration of fructose to 5-HMF at 170 °C in W/DMSO (1:4) using 25% of Ta/Nb-2.5 load on substrate up to 300 min.

| <b>Time (min)</b> | <b><i>Selectivity<sub>HMF</sub></i></b> | <b><i>Yield<sub>LA</sub></i> (%)</b> | <b><i>Yield<sub>FA</sub></i> (%)</b> | <b><i>TON<sub>HMF</sub></i> (sec<sup>-1</sup>)</b> | <b><i>TOF<sub>HMF</sub></i> (10<sup>-6</sup>)</b> | <b><i>Total carbon</i></b> |
|-------------------|-----------------------------------------|--------------------------------------|--------------------------------------|----------------------------------------------------|---------------------------------------------------|----------------------------|
| <b>15</b>         | 61.05                                   | n.d.                                 | n.d.                                 | 0.0328                                             | 36.446                                            | 92.31                      |
| <b>30</b>         | 78.93                                   | n.d.                                 | n.d.                                 | 0.0388                                             | 21.557                                            | 90.27                      |
| <b>45</b>         | 86.85                                   | n.d.                                 | n.d.                                 | 0.0421                                             | 15.581                                            | 93.52                      |
| <b>60</b>         | 89.12                                   | n.d.                                 | n.d.                                 | 0.0441                                             | 12.240                                            | 92.38                      |
| <b>120</b>        | 90.98                                   | n.d.                                 | n.d.                                 | 0.0447                                             | 6.206                                             | 93.68                      |
| <b>180</b>        | 92.30                                   | 6.12                                 | 1.25                                 | 0.0451                                             | 4.178                                             | 99.35                      |
| <b>240</b>        | 70.50                                   | 7.32                                 | 1.77                                 | 0.0378                                             | 2.628                                             | 85.21                      |
| <b>300</b>        | 62.34                                   | 7.94                                 | 1.82                                 | 0.0351                                             | 1.951                                             | 79.93                      |

N.d.-not detected. TON-turn over number is calculated as moles of reactant consumed per mole of catalyst. TOF-turn over frequency is calculated as moles of reactant consumed per mole of catalyst per unit time.

**Table S18.** Effect of catalyst loading on dehydration of fructose to 5-HMF at 170 °C in W/DMSO (1:4) medium using Ta/Nb-2.5 load on substrate after 180 min.

| <b>Catalyst:substrate (wt.%)</b> | <b><i>Selectivity<sub>HMF</sub></i></b> | <b><i>Yield<sub>LA</sub></i> (%)</b> | <b><i>Yield<sub>FA</sub></i> (%)</b> | <b><i>TON<sub>HMF</sub></i> (sec<sup>-1</sup>)</b> | <b><i>TOF<sub>HMF</sub></i> (10<sup>-6</sup>)</b> |
|----------------------------------|-----------------------------------------|--------------------------------------|--------------------------------------|----------------------------------------------------|---------------------------------------------------|
| <b>1:6</b>                       | 82.79                                   | n.d.                                 | n.d.                                 | 0.0395                                             | 3.664                                             |
| <b>1:4</b>                       | 92.30                                   | 6.12                                 | 1.25                                 | 0.0451                                             | 4.178                                             |
| <b>1:2</b>                       | 76.83                                   | 7.73                                 | 1.45                                 | 0.0375                                             | 3.479                                             |

N.d.-not detected. TON-turn over number is calculated as moles of reactant consumed per mole of catalyst. TOF-turn over frequency is calculated as moles of reactant consumed per mole of catalyst per unit time.

**Table S19.** Effect of time on dehydration of fructose to 5-HMF at 160 °C in W/DMSO (1:4) medium using 25% of Ta/Nb-2.5 load on substrate up to 300 min.

| Time (min) | <i>Selectivity<sub>HMF</sub></i> | <i>Yield<sub>LA</sub></i> (%) | <i>Yield<sub>FA</sub></i> (%) | <i>TON<sub>HMF</sub></i> (sec <sup>-1</sup> ) | <i>TOF<sub>HMF</sub></i> (10 <sup>-6</sup> ) |
|------------|----------------------------------|-------------------------------|-------------------------------|-----------------------------------------------|----------------------------------------------|
| 15         | 58.69                            | n.d.                          | n.d.                          | 0.0259                                        | 28.808                                       |
| 30         | 76.79                            | n.d.                          | n.d.                          | 0.0341                                        | 18.952                                       |
| 45         | 78.31                            | n.d.                          | n.d.                          | 0.0387                                        | 14.355                                       |
| 60         | 78.42                            | n.d.                          | n.d.                          | 0.0394                                        | 10.950                                       |
| 120        | 78.43                            | n.d.                          | n.d.                          | 0.0396                                        | 5.503                                        |
| 180        | 76.42                            | 5.58                          | n.d.                          | 0.0398                                        | 3.687                                        |
| 240        | 73.05                            | 6.47                          | 1.72                          | 0.0387                                        | 2.687                                        |
| 300        | 68.26                            | 7.58                          | 1.77                          | 0.0371                                        | 2.061                                        |

N.d.-not detected. TON-turn over number is calculated as moles of reactant consumed per mole of catalyst. TOF-turn over frequency is calculated as moles of reactant consumed per mole of catalyst per unit time.

**Table S20.** Effect of time on dehydration of fructose to 5-HMF at 180 °C in W/DMSO (1:4) medium using 25% of Ta/Nb-2.5 load on substrate up to 300 min.

| Time (min) | <i>Selectivity<sub>HMF</sub></i> | <i>Yield<sub>LA</sub></i> (%) | <i>Yield<sub>FA</sub></i> (%) | <i>TON<sub>HMF</sub></i> (sec <sup>-1</sup> ) | <i>TOF<sub>HMF</sub></i> (10 <sup>-6</sup> ) |
|------------|----------------------------------|-------------------------------|-------------------------------|-----------------------------------------------|----------------------------------------------|
| 15         | 74.71                            | 3.26                          | 0.00                          | 0.0345                                        | 38.343                                       |
| 30         | 80.79                            | 4.44                          | 0.47                          | 0.0395                                        | 21.957                                       |
| 45         | 81.10                            | 5.98                          | 0.56                          | 0.0406                                        | 15.030                                       |
| 60         | 80.74                            | 10.98                         | 0.62                          | 0.0413                                        | 11.463                                       |
| 120        | 79.60                            | 12.84                         | 1.24                          | 0.0409                                        | 5.678                                        |
| 180        | 75.38                            | 17.90                         | 1.31                          | 0.0395                                        | 3.655                                        |
| 240        | 64.17                            | 21.14                         | 6.49                          | 0.0357                                        | 2.481                                        |
| 300        | 55.06                            | 25.73                         | 8.88                          | 0.0327                                        | 1.816                                        |

N.d.-not detected. TON-turn over number is calculated as moles of reactant consumed per mole of catalyst. TOF-turn over frequency is calculated as moles of reactant consumed per mole of catalyst per unit time.

**Table S21.** Effect of time on dehydration of fructose to 5-HMF at 190 °C in W/DMSO (1:4) medium using 25% of Ta/Nb-2.5 load on substrate up to 300 min.

| Time (min) | Selectivity <sub>HMF</sub> | Yield <sub>LA</sub> (%) | Yield <sub>FA</sub> (%) | TON <sub>HMF</sub> (sec <sup>-1</sup> ) | TOF <sub>HMF</sub> (10 <sup>-6</sup> ) |
|------------|----------------------------|-------------------------|-------------------------|-----------------------------------------|----------------------------------------|
| 15         | 72.55                      | 4.98                    | n.d.                    | 0.0345                                  | 38.349                                 |
| 30         | 79.25                      | 7.34                    | 0.91                    | 0.0396                                  | 22.009                                 |
| 45         | 79.87                      | 9.83                    | 1.02                    | 0.0410                                  | 15.176                                 |
| 60         | 77.30                      | 12.72                   | 1.17                    | 0.0401                                  | 11.144                                 |
| 120        | 71.25                      | 18.84                   | 1.21                    | 0.0381                                  | 5.291                                  |
| 180        | 63.53                      | 23.65                   | 1.53                    | 0.0355                                  | 3.289                                  |
| 240        | 56.39                      | 25.92                   | 6.96                    | 0.0331                                  | 2.301                                  |
| 300        | 49.86                      | 28.47                   | 9.48                    | 0.0310                                  | 1.720                                  |

N.d.-not detected. TON-turn over number is calculated as moles of reactant consumed per mole of catalyst. TOF-turn over frequency is calculated as moles of reactant consumed per mole of catalyst per unit time.

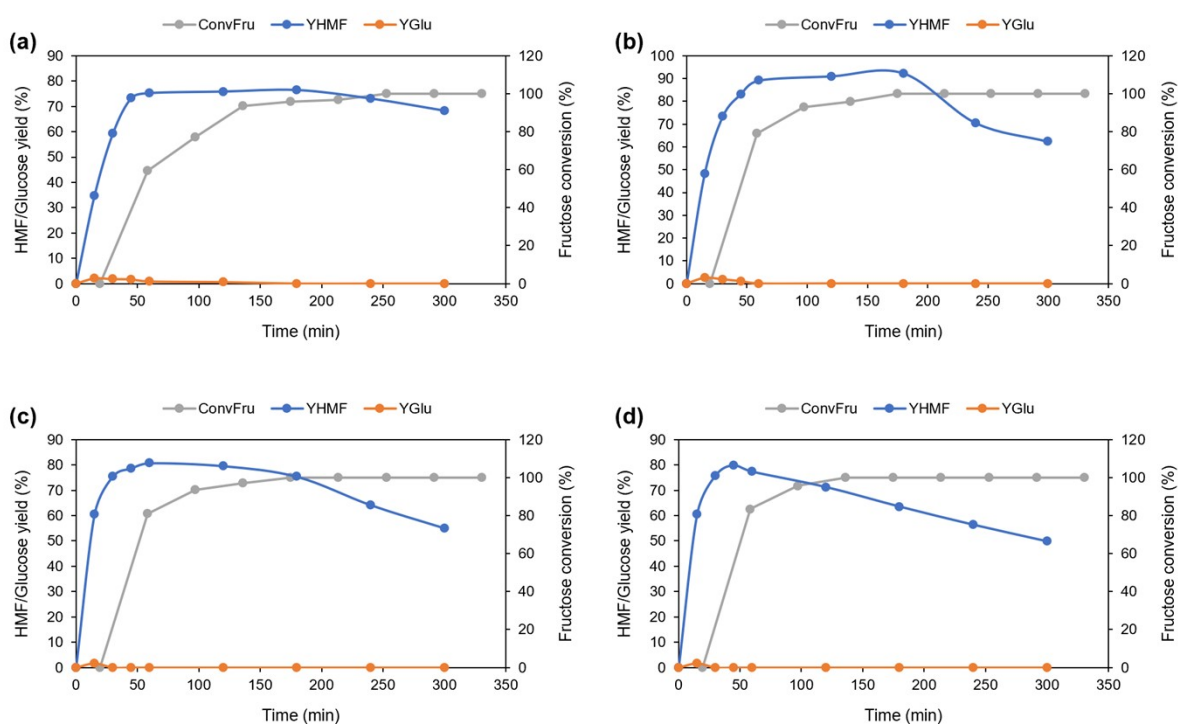

**Figure S15.** Glucose degradation and product(s) formation profile under different temperature conditions: (a) 160 °C, (b) 170 °C, (c) 180 °C, and (d) 190 °C. Reaction conditions: 1:4 vol. ratio W/DMSO medium and 25% wt. catalyst load up to 5 h. Y-yield and Conv-conversion.

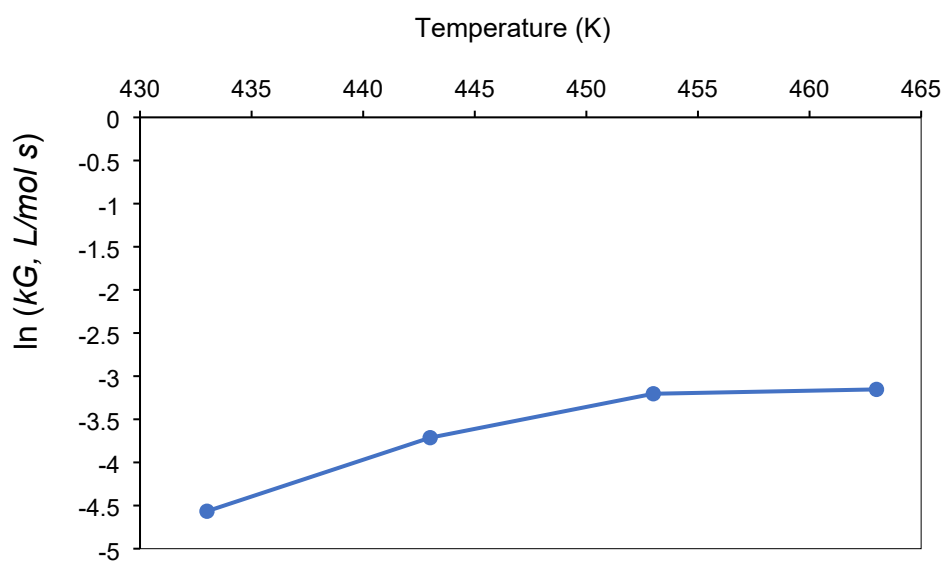

**Figure S16.** Correlation plot of temperature vs. second-order kinetics of glucose decomposition over Ta/Nb-2.5 catalyst in 1:4 vol. ratio W/DMSO under different temperature conditions (160-190 °C) at 25% wt. catalyst load up to 5 h.

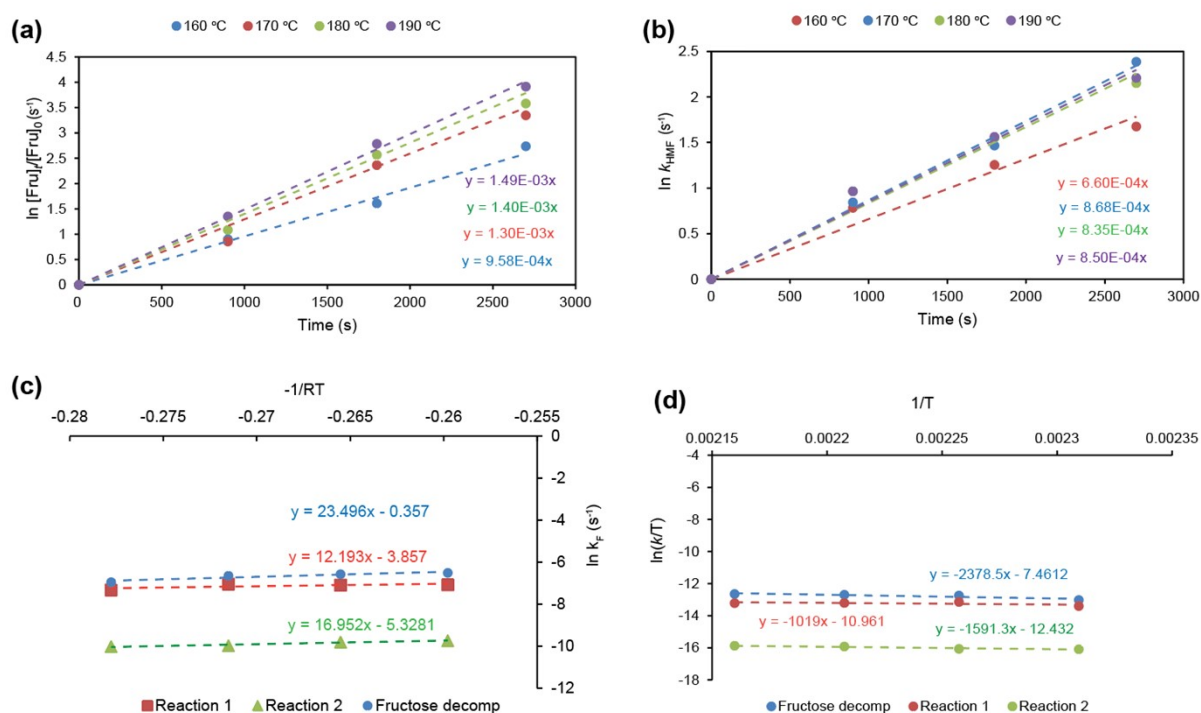

**Figure S17.** (a) First-order kinetics of fructose decomposition over Ta/Nb-2.5 catalyst in 1:4 vol. ratio W/DMSO under different temperature conditions (160-190 °C) at 25% wt. catalyst load up to 5 h; (b) first-order kinetics of HMF formation over Ta/Nb-2.5 catalyst in 1:4 vol. ratio W/DMSO under different temperature conditions (160-190 °C) at 25% wt. catalyst load up to 5 h; (c) Arrhenius plot of rate kinetics of fructose decomposition and reactions (1&2) vs. temperature (160-190 °C) over Ta/Nb-2.5 catalyst in 1:4 vol. ratio W/DMSO; (d) Eyring plot of rate kinetics of fructose decomposition and reactions (1&2) vs. temperature (160-190 °C) over Ta/Nb-2.5 catalyst in 1:4 vol. ratio W/DMSO.



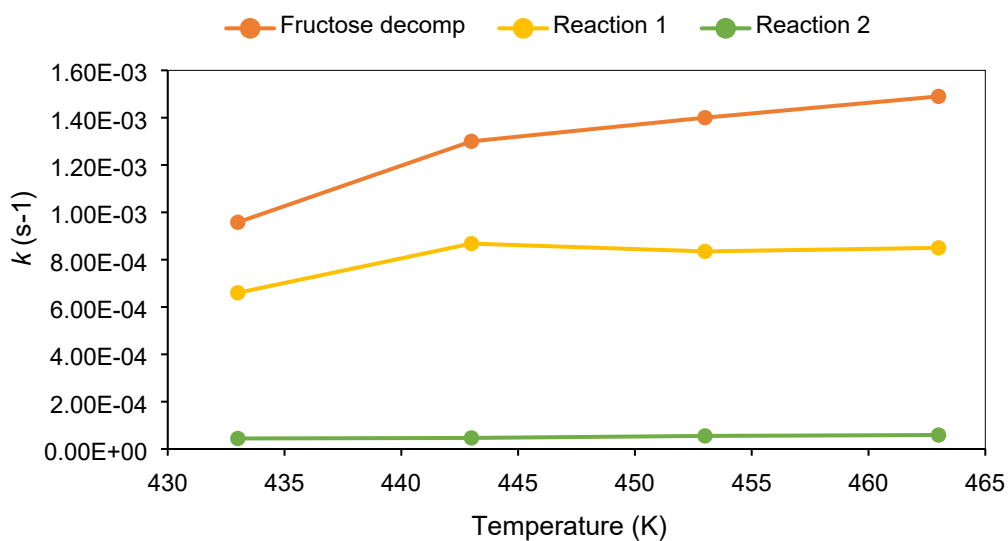

**Figure S18.** Correlation plot of temperature vs. kinetic rate constants of fructose decomposition and reactions (1&2) over Ta/Nb-2.5 catalyst in 1:4 vol. ratio W/DMSO under different temperature conditions (160-190 °C) at 25% wt. catalyst load up to 5 h.

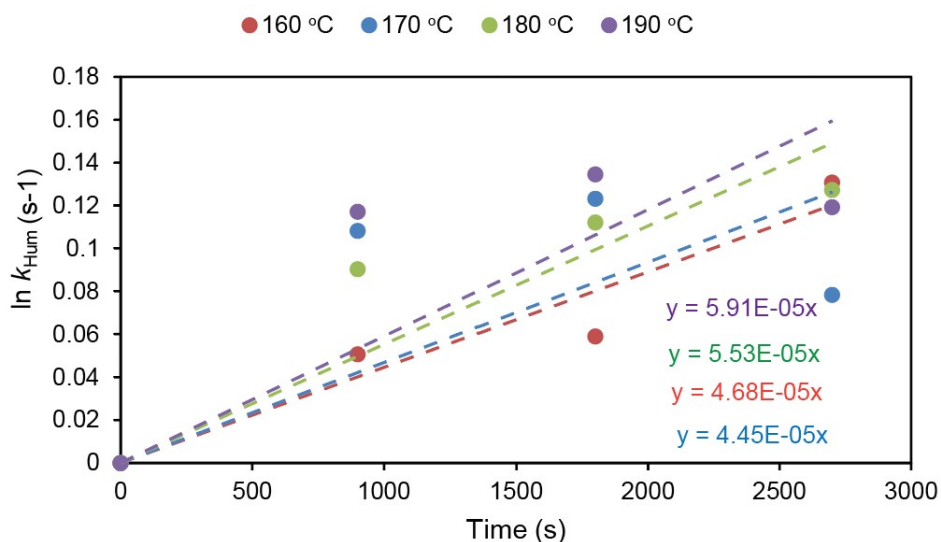

**Figure S19.** First-order rate kinetics of reaction 2 (humins formation) over Ta/Nb-2.5 catalyst in 1:4 vol. ratio W/DMSO under different temperature conditions (160-190 °C) at 25% wt. catalyst load up to 5 h.

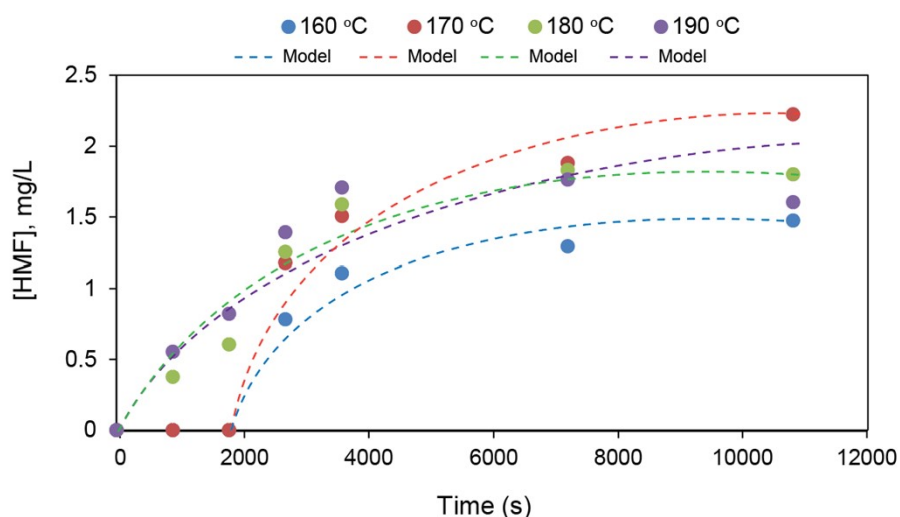

**Figure S20.** Results of experimental vs. model predicted HMF formation over Ta/Nb-2.5 catalyst in 1:4 vol. ratio W/DMSO under different temperature conditions (160-190 °C) at 25% wt. catalyst load up to 5 h.

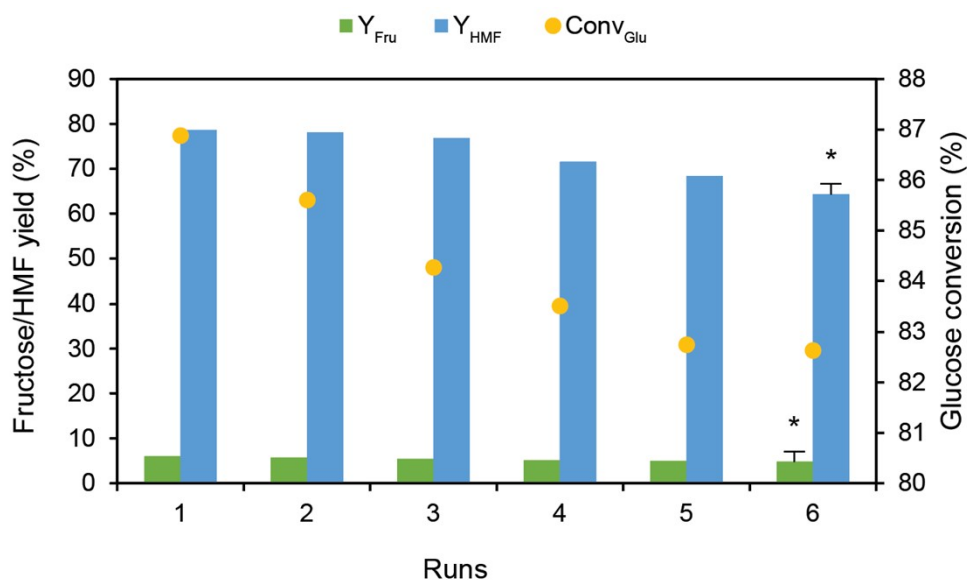

**Figure S21.** Result of Ta/Nb-2.5 recyclability in glucose dehydration to 5-HMF at 170 °C in W/DMSO (1:4) medium using 25% of Ta/Nb-2.5 on substrate after 180 min. Y<sub>Fru</sub>-yield fructose, Y<sub>HMF</sub>-yield HMF and Conv<sub>Glu</sub>-glucose conversion. Error bar represent the standard error. The asterisk marks (\*) and (\*\*) denote the mean data significance and non-significance through ANOVA analysis at  $\alpha=0.05$ .

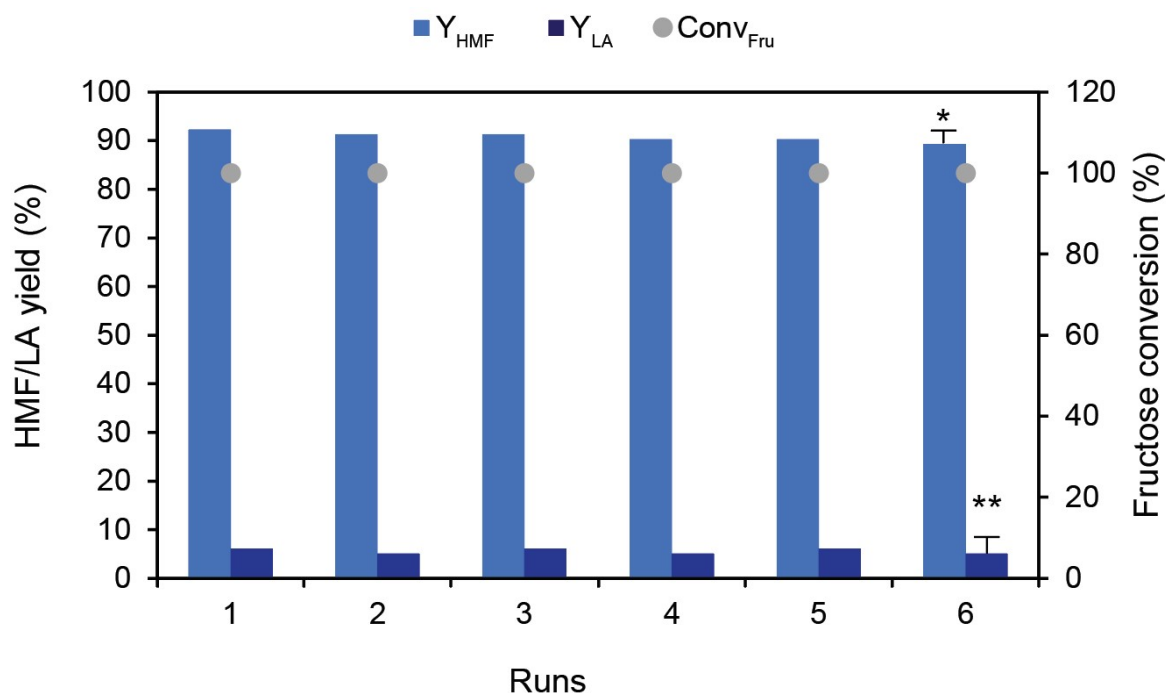

**Figure S22.** Result of Ta/Nb-2.5 recyclability in fructose dehydration to 5-HMF at 170 °C in W/DMSO (1:4) medium using 25% of Ta/Nb-2.5 on substrate after 180 min.  $Y_{Fru}$ -yield fructose,  $Y_{HMF}$ -yield HMF and  $Conv_{Glu}$ -glucose conversion. Error bar represent the standard error. The asterisk marks (\*) and (\*\*) denote the mean data significance and non-significance through ANOVA analysis at  $\alpha=0.05$ .

**Table S22.** Result of Ta/Nb-2.5 recyclability in glucose dehydration to 5-HMF at 170 °C in W/DMSO (1:4) medium using 25% of Ta/Nb-2.5 on substrate after 180 min.

| Cycle | $Selectivity_{fru}$ | $Selectivity_{HMF}$ | $Yield_{LA}$ (%) | $Yield_{FA}$ (%) |
|-------|---------------------|---------------------|------------------|------------------|
| Fresh | 6.64                | 86.55               | 8.83             | 6.39             |
| 1     | 6.14                | 86.01               | 7.73             | 4.11             |
| 2     | 5.64                | 85.91               | 7.68             | 4.04             |
| 3     | 5.68                | 84.25               | 7.52             | 3.96             |
| 4     | 6.25                | 84.85               | 7.26             | 3.90             |
| 5     | 5.02                | 80.51               | 7.84             | 4.14             |

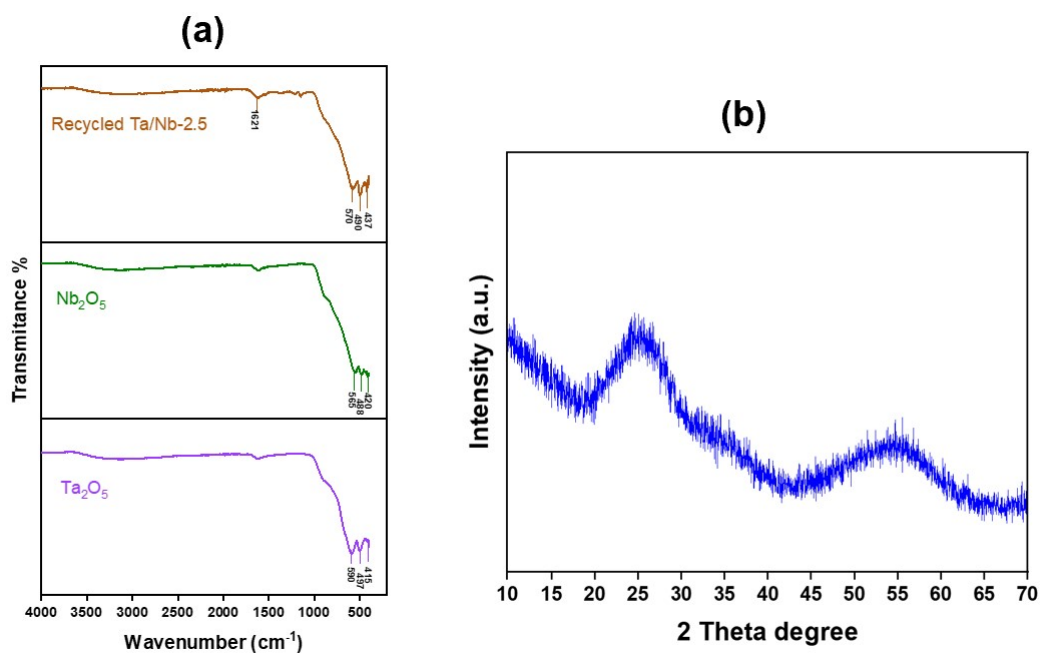

**Figure S23.** FTIR and XRD reports of the recycled Ta/Nb-2.5 catalyst after 6 runs (including the fresh run under optimum conditions).

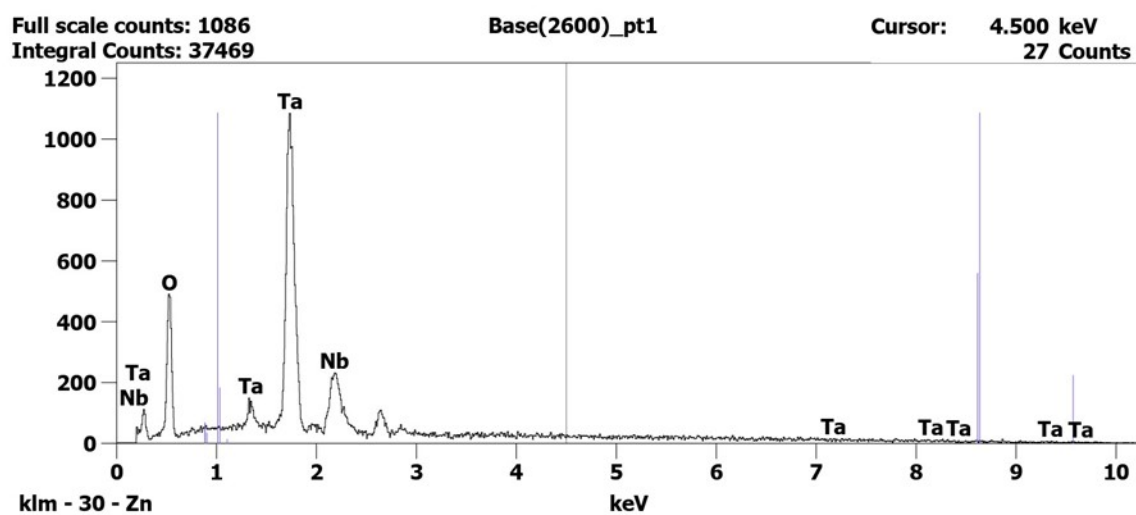

**Figure S24.** EDX result of the recycled Ta/Nb-2.5 catalyst after 6 runs (under optimum conditions).

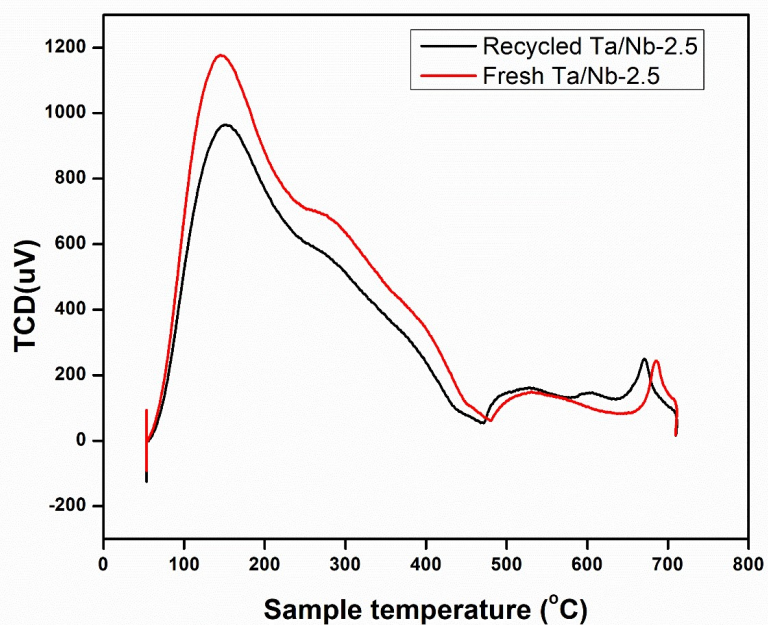

**Figure S25.** Comparative TPD result of recycled Ta/Nb-2.5 catalyst after 6 runs (under optimum conditions) and fresh Ta/Nb-2.5 catalyst.

**Table S23.** Comparative result of metal oxide catalysis of glucose to HMF.

| Substrate      | Catalyst                                                                                      | Reaction conditions                | Yield <sub>HMF</sub> % | Selectivity <sub>HMF</sub> % | Ref.             |
|----------------|-----------------------------------------------------------------------------------------------|------------------------------------|------------------------|------------------------------|------------------|
| Glucose        | Nb/ZrO <sub>2</sub>                                                                           | H <sub>2</sub> O, 3 h, 180 °C      | 22                     | Not mentioned                | 1                |
| Glucose        | NbO/NbP                                                                                       | H <sub>2</sub> O, 2 h, 152 °C      | 26.5                   | 56                           | 2                |
| Glucose        | Al <sub>2</sub> O <sub>3</sub> -B <sub>2</sub> O <sub>3</sub>                                 | DMSO, 2 h, 140 °C                  | 41.4                   | Not mentioned                | 3                |
| Glucose        | SO <sub>4</sub> <sup>2-</sup> /ZrO <sub>2</sub> <sup>2-</sup> -Al <sub>2</sub> O <sub>3</sub> | DMSO, 4 h, 130 °C                  | 48.0                   | Not mentioned                | 4                |
| Glucose        | Sn doped Ta <sub>2</sub> O <sub>5</sub>                                                       | Water/DMSO, 4h, 180 °C             | 57                     | 80                           | 5                |
| Glucose        | SO <sub>4</sub> <sup>2-</sup> /TiO <sub>2</sub> -SiO <sub>2</sub>                             | Water/DMSO, 12 h, 140 °C           | 37                     | Not mentioned                | 6                |
| Glucose        | Na <sub>2</sub> ZrSi <sub>4</sub> O <sub>11</sub> + Amberlyst-15                              | THF-water, 1.5 h, 180 °C           | 39                     | Not mentioned                | 7                |
| Glucose        | Ion exchange resin-Alumina                                                                    | Water-NMP medium at 120 °C for 8 h | 84.9                   | 90.4                         | 8                |
| <b>Glucose</b> | <b>Ta<sub>2</sub>O<sub>5</sub>/Nb<sub>2</sub>O<sub>5</sub></b>                                | <b>Water/DMSO, 3 h, 170 °C</b>     | <b>78.6</b>            | <b>86.5</b>                  | <b>This work</b> |

## References

- (1) Gromov, N. V.; Taran, O. P.; Semeykina, V. S.; Danilova, I. G.; Pestunov, A. V.; Parkhomchuk, E. V.; Parmon, V. N. Solid Acidic NbOx/ZrO<sub>2</sub> Catalysts for Transformation of Cellulose to Glucose and 5-Hydroxymethylfurfural in Pure Hot Water. *Catalysis Letters* **2017**, *147* (6), 1485-1495. DOI: 10.1007/s10562-017-2056-y.
- (2) Catrinck, M. N.; Ribeiro, E. S.; Monteiro, R. S.; Ribas, R. M.; Barbosa, M. H. P.; Teófilo, R. F. Direct conversion of glucose to 5-hydroxymethylfurfural using a mixture of niobic acid and niobium phosphate as a solid acid catalyst. *Fuel* **2017**, *210*, 67-74. DOI: <https://doi.org/10.1016/j.fuel.2017.08.035>.
- (3) Liu, J.; Li, H.; Liu, Y.-C.; Lu, Y.-M.; He, J.; Liu, X.-F.; Wu, Z.-B.; Yang, S. Catalytic conversion of glucose to 5-hydroxymethylfurfural over nano-sized mesoporous Al<sub>2</sub>O<sub>3</sub>-B<sub>2</sub>O<sub>3</sub> solid acids. *Catalysis Communications* **2015**, *62*, 19-23. DOI: <https://doi.org/10.1016/j.catcom.2015.01.008>.
- (4) Yan, H.; Yang, Y.; Tong, D.; Xiang, X.; Hu, C. Catalytic conversion of glucose to 5-hydroxymethylfurfural over SO<sub>4</sub><sup>2-</sup>/ZrO<sub>2</sub> and SO<sub>4</sub><sup>2-</sup>/ZrO<sub>2</sub>-Al<sub>2</sub>O<sub>3</sub> solid acid catalysts. *Catalysis Communications* **2009**, *10* (11), 1558-1563. DOI: <https://doi.org/10.1016/j.catcom.2009.04.020>.
- (5) Mahala, S.; Arumugam, S. M.; Kumar, S.; Singh, D.; Sharma, S.; Devi, B.; Yadav, S. K.; Elumalai, S. Sn Doping on Ta<sub>2</sub>O<sub>5</sub> Facilitates Glucose Isomerization for Enriched 5-Hydroxymethylfurfural Production and its True Response Prediction using a Neural Network Model. *ChemCatChem* **2021**, *13* (22), 4787-4798. DOI: <https://doi.org/10.1002/cctc.202101046>.

- (6) Wang, Y.; Liu, Y.; Yang, L.; Ruan, R.; Wen, P.; Wan, Y. Syntheses of 5-Hydroxymethylfurfural Through Glucose Dehydration in Diphasic Solvent System on ZrO<sub>2</sub> and SO<sub>4</sub><sup>2-</sup>/TiO<sub>2</sub>-SiO<sub>2</sub> Catalyst. *Synthesis and Reactivity in Inorganic, Metal-Organic, and Nano-Metal Chemistry* **2016**, *46* (2), 177-184. DOI: 10.1080/15533174.2014.963237.
- (7) Yue, C.; Rigutto, M. S.; Hensen, E. J. M. Glucose Dehydration to 5-Hydroxymethylfurfural by a Combination of a Basic Zirconosilicate and a Solid Acid. *Catalysis Letters* **2014**, *144* (12), 2121-2128. DOI: 10.1007/s10562-014-1390-6.
- (8) Pumrod, S.; Kaewchada, A.; Roddecha, S.; Jaree, A. 5-HMF production from glucose using ion exchange resin and alumina as a dual catalyst in a biphasic system. *RSC Advances* **2020**, *10* (16), 9492-9498, 10.1039/C9RA09997B. DOI: 10.1039/C9RA09997B.
